# Supplementary material for: Theoretical study of photoacidity of HCN: the effect of complexation with water
Source: Royal Society of Chemistry journal article supplement (doi:10.1039/b610001e), 2006-01-01
Supplement: b610001e.pdf [file b610001e.pdf]

HCN...H<sub>2</sub>O - ground state

|   |           |           |           |
|---|-----------|-----------|-----------|
| H | 0.000000  | 0.041131  | 0.353678  |
| C | 0.000000  | 0.026894  | 1.426831  |
| N | 0.000000  | 0.009461  | 2.593951  |
| O | 0.000000  | 0.044703  | -1.668491 |
| H | 0.757940  | -0.220542 | -2.194706 |
| H | -0.757940 | -0.220542 | -2.194706 |

HCN - (H<sub>2</sub>O) - ( $\pi \rightarrow \pi^*$ ) excited state

CASSCF optimized minimum

|   |           |           |           |
|---|-----------|-----------|-----------|
| C | -1.500690 | -0.567793 | -0.000991 |
| N | -2.361310 | 0.429167  | 0.000560  |
| O | 2.806910  | 0.030861  | 0.000977  |
| H | -0.417357 | -0.413768 | -0.000490 |
| H | 3.274720  | 0.358586  | 0.750537  |
| H | 3.283980  | 0.367491  | -0.761533 |

HCN - (H<sub>2</sub>O) - ( $\pi \rightarrow \pi^*$ ) excited state

From CASPT2 scan

|   |           |           |           |
|---|-----------|-----------|-----------|
| C | 0.000000  | 0.000000  | 1.305700  |
| N | 0.000000  | 0.000000  | 2.611700  |
| O | -2.797613 | 0.000000  | -0.504157 |
| H | -0.931343 | 0.000000  | 0.707329  |
| H | -3.366849 | 0.748886  | -0.560987 |
| H | -3.377714 | -0.763194 | -0.562083 |

HCN - (H<sub>2</sub>O) - ( $\pi \rightarrow \sigma^*$ ) excited state

CASSCF optimized minimum

|   |           |           |           |
|---|-----------|-----------|-----------|
| C | 1.445980  | -0.020184 | -0.135656 |
| N | 2.601710  | 0.013455  | 0.090789  |
| O | -2.821230 | 0.001590  | -0.033953 |
| H | -1.959910 | -0.111107 | 0.374202  |
| H | -3.433600 | -0.723122 | 0.287183  |
| H | -3.209270 | 0.862539  | 0.232450  |

HCN...(H<sub>2</sub>O)<sub>2</sub> - ground state

|   |           |           |           |
|---|-----------|-----------|-----------|
| N | -1.270559 | 0.267602  | -1.619308 |
| C | -1.148855 | -0.143958 | -0.533296 |
| H | -0.935921 | -0.477263 | 0.466709  |
| O | 0.582377  | -0.528612 | 1.817943  |
| H | 1.163264  | -0.053897 | 1.201392  |
| H | 0.689408  | -0.073714 | 2.655249  |
| O | 1.851337  | 0.795610  | -0.349782 |
| H | 1.107983  | 0.956116  | -0.941577 |
| H | 2.463476  | 0.280384  | -0.881259 |
